# Supplementary material
Source: ML conference proceedings conference paper supplement (https://openreview.net/forum?id=bIvIUNH9VQ)
Supplement: supplementary_material [file attachment]

# – Supplementary Material – Hijacking Robot Teams Through Adversarial Communication

Anonymous Author(s)

Affiliation

Address

email

## 1 Appendix A Real-World Demonstrations: Robotarium

2 We use Robotarium [20], a free remotely accessible swarm robotics research platform, to do real-  
3 world demonstrations. It is equipped with a group of miniature differential drive robots ‘GRITSBots’  
4 on a testbed measuring 130×90×180 cm, with a projector and an automatic overhead tracking sys-  
5 tem. The GRITSBot’s main board has WiFienabled 160 MHz ESP8266 chip as the controller and  
6 communication (54 MBit/s WiFi) and the stepper motors droven by Atmega 168 microcontroller  
7 [20]. The global position is tracked using an overhead camera and then used down-stream for safety  
8 checking and feedback control. Features of the robot environment are displayed by the projector for  
9 visualization.

10 First, we need to run our algorithm in the robotarium simulator before implementing it on the real  
11 platform. However, physical collisions are strictly prohibited when using actual robots. To overcome  
12 this limitation, we record the trajectories of each agent in the real environment and perform post-  
13 analysis to determine if there are any instances where two robots collide. This analysis is based on  
14 the relative distance between the robots, following our predefined criteria. A collision between two  
15 robots is defined as when the circles centered on each robot intersect. The radius of each circle is  
16 defined according to the environment specifications [23]. The reward for the environments is defined  
17 as the L2 distance between the robot and its target destination. In PP and PCP, the target is the prey  
18 robot. In SL, the target is the designated goal location. We show the trajectories we collected in  
19 each environment Fig 1.

20 We also include the average reward and collision numbers of each robot in Tables 1-6. It shows  
21 that our adversarial method universally outperforms the random flipping one for each agent since it  
22 makes the attacked agents receive less reward and has fewer collisions with their targets. Moreover,  
23 we find that our method is even more stable than the random flipping one, with standard deviation  
24 only decreasing by 22.97%, 53.33%, and 40.89% on average in the three environments.

Table 1: PCP Reward

|           | Capture Agent 1   | Capture Agent 2   | Average           |
|-----------|-------------------|-------------------|-------------------|
| Adv[Ours] | <b>-0.76±0.32</b> | <b>-0.66±0.36</b> | <b>-0.71±0.34</b> |
| Random    | -0.27±0.29        | -0.090±0.36       | -0.18±0.33        |

Table 2: PCP Collisions

|           | Capture Agent 1  | Capture Agent 2  | Average          |
|-----------|------------------|------------------|------------------|
| Adv[Ours] | <b>0.02±0.14</b> | <b>0.09±0.28</b> | <b>0.05±0.23</b> |
| Random    | 0.17±0.37        | 0.40±0.49        | 0.29±0.45        |

Table 3: SL Reward

|           | Listener          |
|-----------|-------------------|
| Adv[Ours] | <b>-0.43±0.14</b> |
| Random    | -0.21±0.15        |

Table 4: SL Collisions

|           | Listener         |
|-----------|------------------|
| Adv[Ours] | <b>0.00±0.00</b> |
| Random    | 0.34±0.47        |

Table 5: PO-PP Reward

|           | PO Agent 1        | PO Agent 2        | PO Agent 3        | PO Agent 4        | Average           |
|-----------|-------------------|-------------------|-------------------|-------------------|-------------------|
| Adv[Ours] | <b>-0.81±0.34</b> | <b>-0.80±0.27</b> | <b>-0.71±0.31</b> | <b>-0.80±0.30</b> | <b>-0.71±0.34</b> |
| Random    | 0.01±0.56         | -0.06±0.54        | -0.00±0.60        | -0.03±0.54        | 0.02±0.56         |

Table 6: PO-PP Collisions

|           | PO Agent 1       | PO Agent 2       | PO Agent 3       | PO Agent 4       | Average          |
|-----------|------------------|------------------|------------------|------------------|------------------|
| Adv[Ours] | <b>0.00±0.06</b> | <b>0.00±0.00</b> | <b>0.00±0.00</b> | <b>0.00±0.05</b> | <b>0.05±0.23</b> |
| Random    | 0.26±0.44        | 0.06±0.33        | 0.33±0.47        | 0.15±0.35        | 0.20±0.40        |

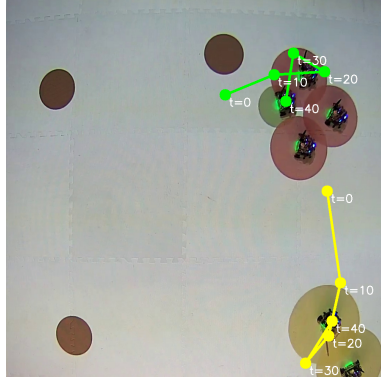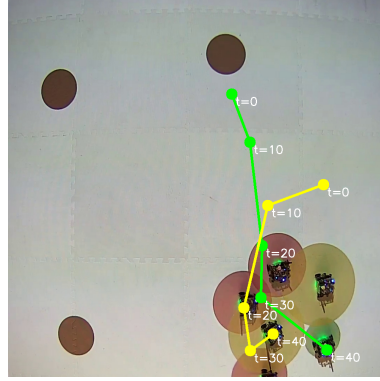

(a) Predator Capture Prey

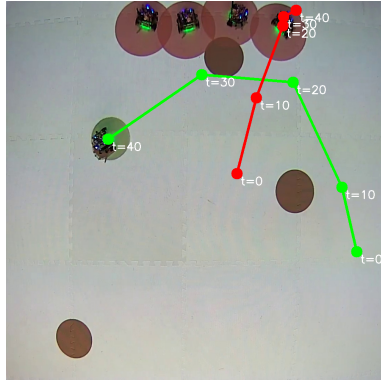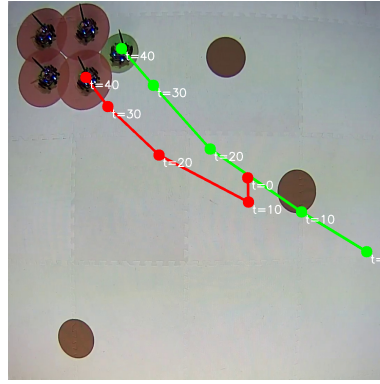

(b) Partially Observable PP

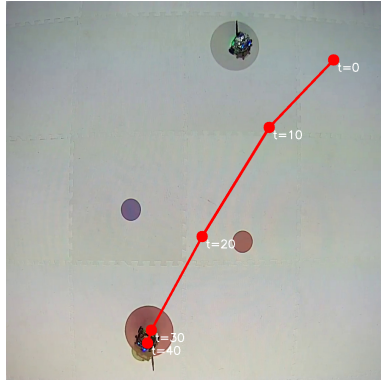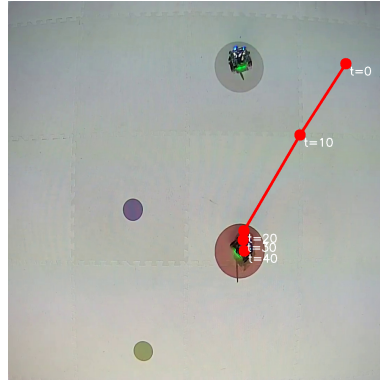

(c) Speaker Listener

Figure 1: Comparison of Environment Trajectories: All three environments are shown, where the left images are the adversarial communication policy rollouts and the right images are the random flipping rollouts.

## 25 Appendix B Simulation Experiment Details

26 Here we show the hyperparameters used in each environment training (Table 7) and qualitative  
27 results (Figure 2).

28 In the PCP environment (a, b), the predators (also called perception agents) are shown as red which  
29 can observe all other agents, however, the yellow capture agent (also called action agents) are blind  
30 and can only know where the prey (green) is by receiving the messages from the predators. There-  
31 fore, communication is the only useful information based on which the capturers can make decisions.  
32 Each capture agent will receive a 16-bit communication from each of the three predators so we in-  
33 tercept 48 bits and modify them with our adversarial policy. Compare with Figure 2(a) and 2(b), we  
34 find that our adversarial policy can successfully push the captures agents away from the prey but the  
35 random flipping one cannot stop the capture agents from pursuing the prey with the same number of  
36 bits flipped.

37 We observe similar behaviors in PO-PP when we compare Figure 2(c) and 2(d), in which the preda-  
38 tors and prey are shown with red and green. The difference between PO-PP and PCP environments  
39 is that we remove the capture agents but change the predators to be partially observable agents which  
40 can only see the prey within a certain distance. Predators change color from red to grey if they ob-  
41 serve the prey. If one predator observes the prey, it can broadcast this information to others with  
42 its 16-bit communication so that the team can cooperate with each other to achieve higher rewards.  
43 When we apply the adversarial policy (see Figure 2), we find that the predators just ignore the prey  
44 even though they see it and never collaborate to collide with the prey compared with the random  
45 flipping one in Figure 2.

46 In the speaker-listener environment (Figure 2(e, f)), the speaker knows the colored goal the listener  
47 should go to but the listener does not. However, the listener knows the position of the three colored  
48 goals. Therefore, the speaker needs to learn to communicate the correct color within its 16-bit  
49 communication and the listener should learn which color it needs to go to from the message. Our  
50 adversarial method (2) can make the listener go to a completely wrong colored destination, while  
51 the random flipping method cannot because it cannot attack the crucial bits of the communication.

Table 7: Hyperparameters for training and testing PCP, PO-PP and SL

| Hyperparameter                     | Environment    | Value   |
|------------------------------------|----------------|---------|
| Buffer Length                      | PCP, PO-PP, SL | 1048576 |
| Episode Number                     | PCP, PO-PP, SL | 50001   |
| Episode Length                     | PCP, PO-PP, SL | 100     |
| Batch Size                         | PCP, PO-PP, SL | 1024    |
| Discount Factor $\gamma$           | PCP, PO-PP, SL | 0.9     |
| Learning Rate                      | PCP, PO-PP, SL | 0.0001  |
| Regularizer Coefficient $\alpha_0$ | PCP, SL        | 0.1     |
| Regularizer Coefficient $\alpha_0$ | PO-PP          | 0.004   |
| Regularizer Intercept $\beta$      | PCP, PO-PP, SL | 3000    |
| Regularizer Slope $\epsilon$       | PCP, PO-PP, SL | 20000   |
| Perception Threshold $\eta$        | PCP, PO-PP, SL | 3       |

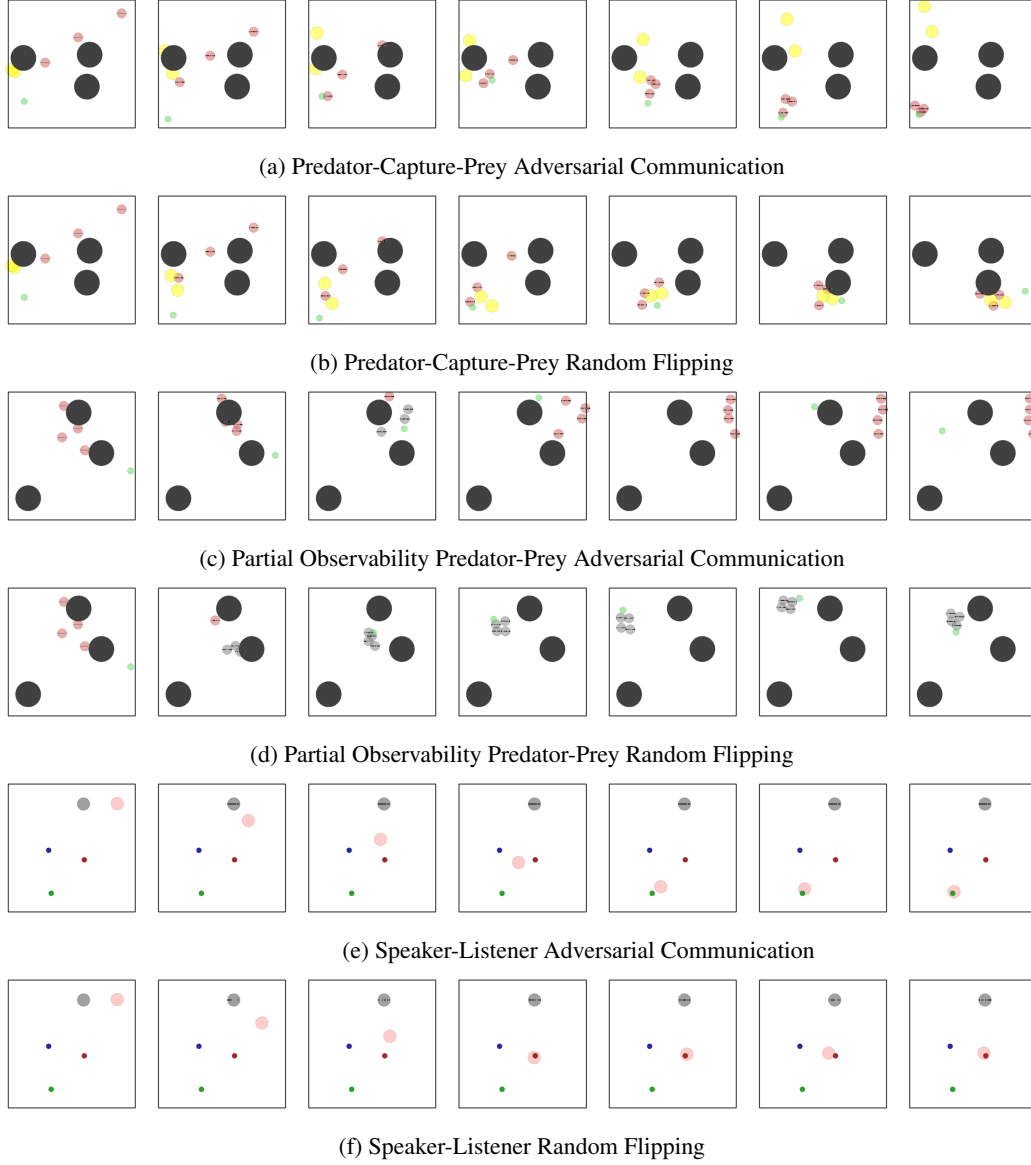

Figure 2: These image series show the performance of agents when applying our adversarial communication and random flipping strategy in three environment: Predator-Capture-Prey (a, b), Partial Observability Predator-Prey (c, d) and Speaker-Listener (e, f).

## 52 Appendix C Adversarial Message Parameterization

### 53 Appendix C.1 Normalized Scores Formulations

54 As we are making comparisons across different methods, we utilize the score

$$S = \frac{RC_{no\_adv} - RC_{adv}}{\max(N_f - \eta)} \quad (1)$$

55 where  $RC_{adv}$  and  $RC_{no\_adv}$  represent the reward or the collision number with or without applying  
 56 the adversarial policy and their difference evaluates how much the adversarial communication chan-  
 57 nel degrades the agent performance. We normalize by the performance score with the number of  
 58 bits flipped with a perception threshold  $\eta$  which increases the numeric stability in case of extremely  
 59 small flipping number  $N_f$ .

### 60 Appendix C.2 Normalized Score Tables for Attacked Agents

61 We show detailed tables that quantify the reward and number of collisions for each agent here for our  
 62 adversarial communication with flipping mode, direct mode and the random flipping. Our proposed  
 method is uniformly better than all other strategies across all attacked agents.

Table 8: PCP Reward Scores

|             | Capture Agent 1  | Capture Agent 2  | Average          |
|-------------|------------------|------------------|------------------|
| Adv[Ours]   | <b>0.10±0.06</b> | <b>0.12±0.05</b> | <b>0.11±0.05</b> |
| Adv[Direct] | 0.01±0.01        | 0.01±0.01        | 0.01±0.01        |
| Random      | 0.01±0.01        | 0.01±0.01        | 0.01±0.01        |

Table 10: SL Reward Scores

|             | Listener         |
|-------------|------------------|
| Adv[Ours]   | <b>0.13±0.06</b> |
| Adv[Direct] | 0.11±0.05        |
| Random      | 0.04±0.02        |

Table 9: PCP Collision Scores

|             | Capture Agent 1  | Capture Agent 2  | Average          |
|-------------|------------------|------------------|------------------|
| Adv[Ours]   | <b>4.53±2.23</b> | <b>4.63±2.23</b> | <b>4.58±2.23</b> |
| Adv[Direct] | 1.07±0.14        | 1.07±0.14        | 1.07±0.14        |
| Random      | 0.93±0.29        | 0.99±0.29        | 0.96±0.29        |

Table 11: SL Collision Scores

|             | Listener          |
|-------------|-------------------|
| Adv[Ours]   | <b>31.38±6.51</b> |
| Adv[Direct] | 30.72±6.19        |
| Random      | 13.68±3.19        |

Table 12: PO-PP Reward Scores

|             | PO Agent 1       | PO Agent 2       | PO Agent 3       | PO Agent 4       | Average          |
|-------------|------------------|------------------|------------------|------------------|------------------|
| Adv[Ours]   | <b>0.04±0.02</b> | <b>0.04±0.02</b> | <b>0.04±0.02</b> | <b>0.04±0.02</b> | <b>0.04±0.02</b> |
| Adv[Direct] | 0.02±0.01        | 0.02±0.01        | 0.02±0.01        | 0.02±0.00        | 0.02±0.01        |
| Random      | 0.00±0.01        | 0.00±0.01        | 0.00±0.01        | 0.01±0.01        | 0.00±0.01        |

Table 13: PO-PP Collision Scores

|             | PO Agent 1       | PO Agent 2       | PO Agent 3       | PO Agent 4       | Average          |
|-------------|------------------|------------------|------------------|------------------|------------------|
| Adv[Ours]   | <b>1.41±0.55</b> | <b>1.44±0.51</b> | <b>1.52±0.51</b> | <b>1.42±0.65</b> | <b>1.45±0.55</b> |
| Adv[Direct] | 0.76±0.07        | 0.78±0.07        | 0.82±0.08        | 0.84±0.08        | 0.80±0.07        |
| Random      | 0.10±0.87        | 0.34±0.86        | 0.33±0.92        | 0.43±0.88        | 0.30±0.88        |

63
